# Supplementary material for: Hormonal and transcriptional profiles highlight common and differential host responses to arbuscular mycorrhizal fungi and the regulation of the oxylipin pathway
Source: PubMed Central journal article supplement — J Exp Bot. 2010 Apr 8;61(10):2589–601. doi: 10.1093/jxb/erq089 (PMC2882257; doi:10.1093/jxb/erq089), 2010-04-08
Supplement: erq089_1.pdf [file erq089_1.pdf]

**Hormonal and transcriptional profiles highlight common and differential host responses to two arbuscular mycorrhizal fungi and the regulation of the oxylipin pathway.** JA Lopez-Raez, A Verhage, I Fernandez, JM Garcia, C Azcon-Aguilar, V Flors, and MJ Pozo

**SUPPLEMENTARY DATA**

**Table S1.** Primer sequences used in the real time qPCR analysis.

| ID       | Gene                                                                | Primers (5'-3')                                                 |
|----------|---------------------------------------------------------------------|-----------------------------------------------------------------|
| U09026   | Lipoxygenase A (LOXA) <sup>1</sup>                                  | GGTTACCTCCCAAATCGTCC<br>TGTTTGTAAGTGCCTGTG                      |
| U37840   | Lipoxygenase D (LOXD) <sup>2</sup>                                  | GACTGGTCCAAGTTCACGATCC<br>ATGTGCTGCCAATATAAATGGTTCC             |
| AJ271093 | Allene oxide synthase 1 (AOS1) <sup>1</sup>                         | CACCTGTAAACAAGCGAAAC<br>GACCTGGTGGCATGTTCGT                     |
| AF230371 | Allene oxide synthase 2 (AOS2) <sup>2</sup>                         | AGATTTTCTCCCGAATATGCTGAA<br>ATACTACTGATTTTCATCAACGGCAT          |
| AF454634 | Allene oxide synthase 3 (AOS3) <sup>1</sup>                         | GCGGAGGAGTTCAATCCAG<br>CGCATGAAAACTCCACAACC                     |
| AF384374 | Allene oxide cyclase (AOC) <sup>2</sup>                             | GCACGAAGAAGAGAAGAAAGGAGAT<br>CGGTGACGGCTAGGTAAGTTTC             |
| AJ278332 | 12-oxophytodienoate 3 reductase (OPR3) <sup>2</sup>                 | TTGGCTTAGCAGTTGTTGAAAG<br>TACGTATCGTGGCTGTGTTACA                |
| AF317515 | Divinyl ether synthase (DES) <sup>1</sup>                           | CCGGATGAGTTTGTACCTGA<br>ATCTTTGCCTGGACATTGCT                    |
| AF083253 | Multicystatin <sup>2</sup>                                          | GAGAATTTCAAGGAAGTTCAA<br>GGCTTTATTTACACAGAGATA                  |
| K03291   | Proteinase inhibitor II <sup>2</sup>                                | GAAAATCGTTAATTTATCCCAC<br>ACATACAAACTTTCCATCTTTA                |
| BI933750 | 1-deoxy-D-xylulose 5-phosphate 2 (DXS-2) <sup>1</sup>               | AGACGGTCCAACGCATTGT<br>CCTCTAGGAAATCGGAAACA                     |
| U30465   | Class II chitinase (Chi2;1) <sup>1</sup>                            | TGCTGCTTGTGGTGCAGAAAG<br>TGCCCATCCACCCGTAG                      |
| CN384809 | 1-aminocyclopropane-1-carboxylic acid oxidase 1 (ACO1) <sup>1</sup> | GGACTCCGCGCTCATAACAGA<br>ATAGAGTGGCGCATGGG                      |
| X58885   | Ethylene forming enzyme (EFE) <sup>1</sup>                          | CGCAGGAGGCATCATACTTC<br>CTTCCCGTTGGTAATCAC                      |
| AY394002 | CTR1-like protein kinase (CTR4) <sup>1</sup>                        | CATCCTCTTTCTTACTGTGAGAAAATTTAGA<br>CATTTCCCTGTATAAAAACGTTTCAGTT |
| Z97215   | 9-cis-epoxycarotenoid (NCED) <sup>1</sup>                           | ACCCACGAGTCCAGATTTTC<br>GGTTCAAAAAGAGGGTTAGC                    |
| AY885651 | Phosphate transporter LePT4 <sup>3</sup>                            | GAAGGGGAGCCATTTAATGTGG<br>ATCGCGGCTTGTTTAGCATTTTC               |
| M69247   | Pathogenesis related protein PR1a <sup>1</sup>                      | ATGTGTGTGTTGGGGTTGGT<br>ACTTTGGCACATCCAAGACG                    |
| Y15846   | Pathogenesis protein PR10-like <sup>1</sup>                         | CCAAGGCTGTAGAAGCATACC<br>CGTCTCTCATTGAGCGTTT                    |
| X51904   | Le4 <sup>1</sup>                                                    | ACTCAAGGCATGGGTACTGG<br>CCTTCTTTCTCCTCCACCT                     |
| X14449   | Elongation factor 1 (SIEF) <sup>4</sup>                             | GATTGGTGGTATTGGAAGTGC<br>AGCTTCGTGGTGCATCTC                     |
| DQ282611 | GintEF <sup>5</sup>                                                 | GCTATTTTGATCATTGCCGCC<br>TCATTAACGTTCTTCCGACC                   |

<sup>1</sup>This work; <sup>2</sup>Uppalapati *et al.*, 2005; <sup>3</sup>Balestrini *et al.*, 2007; <sup>4</sup>Rotenberg *et al.*, 2006; <sup>5</sup>Benabdellah *et al.*, 2009

**Table S2.** Mycorrhization, root and shoot fresh weights, and phosphorus content in tomato plants colonized by *G. mosseae* (Gm) or *G. intraradices* (Gi). Nm indicates control non-mycorrhizal plants.

|    | Mycorrhization (%)  | Root weight (g)          | Shoot weight (g)         | Shoot P content (%)      |
|----|---------------------|--------------------------|--------------------------|--------------------------|
| Nm | 0                   | 1.95 ± 0.35 <sup>a</sup> | 5.84 ± 0.68 <sup>a</sup> | 0.19 ± 0.02 <sup>a</sup> |
| Gm | 23 ± 4 <sup>a</sup> | 1.91 ± 0.43 <sup>a</sup> | 5.58 ± 1.02 <sup>a</sup> | 0.16 ± 0.01 <sup>a</sup> |
| Gi | 41 ± 7 <sup>b</sup> | 1.70 ± 0.62 <sup>a</sup> | 5.44 ± 1.66 <sup>a</sup> | 0.17 ± 0.01 <sup>a</sup> |

Numbers represent the average of 3 independent replicates ± SD. Different superscript letters indicate statistically significant differences between means ( $P < 0.05$ ).

**Table S3.** Expression level of genes involved in hormone metabolism in roots colonized by *G. mosseae* (Gm) or *G. intraradices* (Gi).

| ID       | Annotation                                                               | Roots     |           |
|----------|--------------------------------------------------------------------------|-----------|-----------|
|          |                                                                          | Gm        | Gi        |
|          | <b>Jasmonates</b>                                                        |           |           |
| U09026   | Lipoxygenase A (LoxA)                                                    | 6.59      | 2.78      |
| U09025   | Lipoxygenase B (LoxB)                                                    | <i>nd</i> | <i>nd</i> |
| U37839   | Lipoxygenase C (LoxC)                                                    | <i>nd</i> | <i>nd</i> |
| U37840   | Lipoxygenase D (LoxD)                                                    | 1.27      | 2.17      |
| AJ271093 | Allene oxide synthase (AOS1)                                             | 2.14      | 2.52      |
| AF230371 | Allene oxide synthase (AOS2)                                             | 0.97      | 0.89      |
| AF454634 | Allene oxide synthase (AOS3)                                             | 8.49      | 3.42      |
| AF384374 | Allene oxide cyclase (AOC)                                               | 1.34      | 1.29      |
| AJ278332 | 12-oxophytodienoate 3 reductase (OPR3)                                   | 0.94      | 1.05      |
| BG628687 | Jasmonic acid carboxyl methyl transferase (JMT)                          | 1.53      | 1.62      |
| BT013697 | Jasmonate-amino synthetase (JAR1)                                        | 1.03      | 1.10      |
| AY455313 | Methyl jasmonate esterase (JAME)                                         | 2.16      | 2.82      |
| BG628191 | Jasmonate ZIM domain 2 (JAZ2)                                            | 2.23      | 2.49      |
|          | <b>ABA</b>                                                               |           |           |
| Z97215   | 9- <i>cis</i> -epoxycarotenoid (NCED1)                                   | 0.96      | 0.69      |
| AF258808 | Aldehyde oxidase 1 (AO1)                                                 | 0.97      | 0.93      |
| AF258809 | Aldehyde oxidase 2 (AO2)                                                 | 0.89      | 0.92      |
| AF258810 | Aldehyde oxidase 3 (AO3)                                                 | 1.13      | 1.16      |
| AF258811 | Aldehyde oxidase 4 (AO4)                                                 | <i>nd</i> | <i>nd</i> |
| AY074788 | Moco sulfurase (FLACCA)                                                  | 1.29      | 0.99      |
| AW034203 | ABA 8'-hydroxylase                                                       | 0.62      | 1.66      |
| Y14809   | Beta-carotene hydroxylase (CrtR-b1)                                      | 0.63      | 0.79      |
| BG734834 | Zeaxanthin epoxydase                                                     | 0.78      | 0.89      |
| AF385366 | Violaxanthin epoxydase                                                   | <i>nd</i> | <i>nd</i> |
| AW219893 | ABA-induced protein                                                      | 0.84      | 0.99      |
|          | <b>ET</b>                                                                |           |           |
| M34289   | ACC synthase 2 (ACS2)                                                    | <i>nd</i> | <i>nd</i> |
| U17972   | ACC synthase 3 (ACS3)                                                    | <i>nd</i> | <i>nd</i> |
| X58885   | Ethylene forming enzyme (ACO)                                            | 0.69      | 1.13      |
| CN384809 | ACC oxidase 1 (ACO1)                                                     | 2.35      | 2.27      |
| AB013101 | ACC oxidase 4 (ACO4)                                                     | 0.64      | 0.65      |
| AJ715790 | ACC oxidase 5 (ACO5)                                                     | <i>nd</i> | <i>nd</i> |
| AY394002 | CTR1-like protein kinase (CTR4)                                          | 1.11      | 1.13      |
| AF110518 | CTR1-like protein kinase (ethylene-inducible)                            | 1.12      | 0.99      |
|          | <b>SA</b>                                                                |           |           |
| BG626517 | S-adenosyl-L-methionine:salicylic acid carboxyl methyltransferase (SAMT) | <i>nd</i> | <i>nd</i> |

Genes involved in the metabolism and signaling of jasmonates, abscisic acid (ABA), ethylene (ET) and salicylic acid (SA) and present in the Affymetrix GeneChip Tomato Genome Array are shown. Data are expressed as fold-change in expression levels compared to the non-mycorrhizal control roots according to the microarray analysis. *nd* indicates non-detected expression.

**Table S4.** Genes specifically induced or repressed in tomato roots colonized by *G. intraradices* (Gi). Fold-change in their expression level compared to non mycorrhizal plants or upon methyl jasmonate (MeJA) treatment.

| <b>ID</b> | <b>Annotation</b>                                   | <b>Gi</b> | <b>MeJA</b> |
|-----------|-----------------------------------------------------|-----------|-------------|
| AI771939  | Class III alcohol dehydrogenase 5                   | 5.04      | 2.89        |
| AF243040  | Receptor-like protein kinase (PRK3)                 | 4.85      | 0.99        |
| AI899070  | Ent-kaurene oxidase (CYP701A)                       | 4.27      | 0.99        |
| AW030757  | Gibberellin 2-oxidase (SIGA2ox3)                    | 4.26      | 5.49        |
| BI204920  | Zinc finger (C3HC4-type RING finger)                | 4.19      | 26.42       |
| BI922195  | Class III alcohol dehydrogenase 5                   | 3.85      | 1.44        |
| M80604    | Beta-1,3-glucanase                                  | 3.31      | 0.07        |
| BM409727  | N-hydroxycinnamoyl/benzoyltransferase               | 3.26      | 4.83        |
| BT012691  | 2-oxoglutarate-dependent dioxygenase                | 3.16      | 15.39       |
| AF254793  | Lycopene beta-cyclase (CrtL-b)                      | 3.02      | 0.64        |
| CN385777  | Zinc finger (C2HC2)                                 | 2.87      | 9.10        |
| AW035980  | Amino acid binding (ACR8)                           | 2.81      | 2.09        |
| BG631850  | Phytoene desaturase (PDS)                           | 2.75      | 0.76        |
| AW625888  | 1-aminocyclopropane-1-carboxylic acid oxidase (ACO) | 2.70      | 1.63        |
| BG628645  | Chitinase                                           | 2.65      | 1.69        |
| BT014289  | 1-phosphatidylinositol phosphodiesterase-related    | 2.64      | 8.45        |
| BG627506  | Carbonic anhydrase                                  | 2.63      | 276.72      |
| BT012812  | Elongation factor-like                              | 2.60      | 4.59        |
| BI932691  | Unknown                                             | 2.57      | 1.02        |
| AF096246  | Ethylene-responsive transcriptional coactivator     | 2.55      | 3.31        |
| AW928514  | Peroxidase                                          | 2.49      | 0.17        |
| BT013303  | 4-amino-4-deoxychorismate lyase                     | 2.48      | 0.30        |
| BI210904  | Purine transmembrane transporter (AtPUP3)           | 2.44      | 1.77        |
| BG627658  | Unknown                                             | 2.43      | 2.42        |
| BE353179  | N-acetyltransferase                                 | 2.32      | 4.84        |
| U89256    | DNA-binding protein Pti5                            | 2.31      | 4.70        |
| AW219676  | Unknown                                             | 2.29      | 3.53        |
| BT013913  | L-lactate dehydrogenase                             | 2.26      | 1.60        |
| BG643871  | Enoyl-[acyl-carrier-protein] reductase              | 2.24      | 0.16        |
| CN385420  | Calcium binding protein                             | 2.24      | 5.90        |
| U37840    | Lipoxygenase D (LOXD)                               | 2.17      | 10.79       |
| AI777697  | Unknown                                             | 2.16      | 0.91        |
| BT013211  | Cystathionine beta-synthase                         | 2.15      | 0.45        |
| AF195507  | Zeta-carotene desaturase (ZDS)                      | 2.13      | 1.51        |
| BT014379  | Histidine decarboxylase                             | 2.11      | 0.36        |
| AW092785  | Unknown                                             | 2.11      | 1.38        |
| BI928506  | Annexin                                             | 2.11      | 4.48        |
| BT013586  | Heat shock protein 70 kD (Hsc-1)                    | 2.11      | 3.56        |
| AW223067  | Calmodulin                                          | 2.09      | 1.07        |
| AI775872  | 2-oxoglutarate-dependent dioxygenase                | 2.07      | 1.12        |
| BG628954  | Unknown                                             | 2.02      | 1.35        |
| BM410464  | Sodium symporter-related                            | 2.02      | 0.78        |
| AI485696  | Calmodulin                                          | 1.99      | 0.97        |
| BG628875  | Unknown                                             | 1.99      | 0.31        |
| BG627003  | S-adenosylmethionine decarboxylase 2                | 1.97      | 3.58        |

|          |                                                       |      |      |
|----------|-------------------------------------------------------|------|------|
| BT014384 | 2-oxoglutarate-dependent dioxygenase                  | 1.96 | 4.77 |
| AJ784458 | Heat shock protein cognate 70                         | 1.95 | 1.68 |
| AF331705 | 1-deoxy-D-xylulose-5-phosphate reductoisomerase (DXR) | 1.94 | 2.42 |
| AY368906 | Heat shock protein 90                                 | 1.89 | 1.60 |
| BG630651 | Unknown                                               | 1.88 | 1.33 |
| BG735346 | Kinesin                                               | 1.87 | 0.67 |
| BG627878 | Unknown                                               | 1.79 | 0.41 |
| BT014625 | Replication factor C                                  | 1.79 | 0.55 |
| BT013273 | Unknown                                               | 1.73 | 1.21 |
|          |                                                       |      |      |
| AW092917 | Xyloglucan:xyloglucosyl transferase                   | 0.59 | 0.18 |
| CK715113 | Unknown                                               | 0.59 | 0.73 |
| AF218774 | Aquaporin PIP1                                        | 0.59 | 0.30 |
| CK720557 | Acid phosphatase class B                              | 0.58 | 0.15 |
| BG628504 | Germin-like protein                                   | 0.58 | 1.41 |
| BT014421 | Isoflavone reductase                                  | 0.58 | 1.11 |
| AW429117 | Unknown                                               | 0.58 | 2.35 |
| CN385091 | Peroxidase                                            | 0.57 | 0.56 |
| CK715831 | Zinc-binding protein                                  | 0.56 | 0.95 |
| BE451719 | Aquaporin PIP2                                        | 0.56 | 0.06 |
| AI898522 | 2-nitropropane dioxygenase                            | 0.56 | 3.52 |
| AI490099 | Endonuclease (tbn1)                                   | 0.56 | 1.13 |
| CN385508 | Proline dehydrogenase                                 | 0.55 | 0.82 |
| BG630440 | Unknown                                               | 0.55 | 0.38 |
| CN384666 | Germin-like protein                                   | 0.55 | 1.72 |
| AF193439 | Glutathione S-transferase/oxidase                     | 0.54 | 3.02 |
| BF050423 | GDP-mannose 3,5-epimerase                             | 0.54 | 0.25 |
| CN385367 | Glutaredoxin                                          | 0.54 | 4.30 |
| AW737374 | MYB transcription factor (AIM1)                       | 0.53 | 5.77 |
| BT014260 | Unknown                                               | 0.53 | 0.16 |
| BI925563 | Auxin efflux carrier protein                          | 0.53 | 5.55 |
| AY324397 | Alternative oxidase 1c                                | 0.52 | 0.92 |
| BG627815 | LIM domain protein WLIM1                              | 0.52 | 0.39 |
| AW625684 | Asparagine synthetase (AS1)                           | 0.52 | 2.64 |
| CN385091 | Peroxidase                                            | 0.51 | 0.44 |
| AW217188 | Germin-like protein                                   | 0.51 | 1.89 |
| CK715555 | Dopamine beta-monoxygenase                            | 0.51 | 1.40 |
| AY497477 | Xyloglucan endotransglucosylase-hydrolase XTH6        | 0.50 | 0.39 |
| U18678   | Isocitrate lyase                                      | 0.50 | 2.07 |
| BF098450 | Pectinesterase inhibitor                              | 0.50 | 2.25 |
| BI208081 | Medium-chain acyl CoA synthetase                      | 0.49 | 3.72 |
| BG643520 | Fasciclin-like arabinogalactan-protein 12             | 0.49 | 1.26 |
| BG133955 | Cysteine-type peptidase                               | 0.49 | 0.47 |
| BT013407 | Lactoylglutathione lyase                              | 0.49 | 0.91 |
| CK714985 | (1-4)-beta-mannan endohydrolase                       | 0.48 | 0.87 |
| CN384849 | Calmodulin                                            | 0.48 | 1.27 |
| AW033570 | Amino acid binding protein                            | 0.48 | 0.28 |
| AW625370 | LOB domain-containing protein                         | 0.46 | 1.82 |
| AW626006 | Unknown                                               | 0.46 | 1.38 |
| AI490099 | Putative endonuclease precursor                       | 0.45 | 1.45 |
| AJ011914 | bZIP transcription factor THY5                        | 0.44 | 0.47 |
| CN385880 | Fasciclin-like arabinogalactan protein                | 0.44 | 1.06 |

|          |                              |      |       |
|----------|------------------------------|------|-------|
| AW218741 | 60S ribosomal protein L6     | 0.43 | 1.32  |
| CK575023 | Nam-like protein             | 0.43 | 5.96  |
| BG126009 | Unknown                      | 0.43 | 1.02  |
| BG734719 | Unknown                      | 0.43 | 0.33  |
| AW649367 | Carbohydrate transporter     | 0.43 | 20.75 |
| AW738551 | Carbohydrate transporter     | 0.43 | 24.15 |
| BG626715 | Apyrase-like protein         | 0.43 | 1.26  |
| BT013228 | Transcription factor Y       | 0.42 | 0.14  |
| BT013477 | Glycolate oxidase            | 0.42 | 2.37  |
| Z68309   | Metallothionein-like protein | 0.42 | 0.93  |
| BM408981 | Copper-binding protein       | 0.41 | 1.29  |
| BG127578 | 60S ribosomal protein L6     | 0.39 | 1.17  |
| AJ417830 | Extensin-like protein        | 0.36 | 0.13  |
| AW626016 | Cationic peroxidase          | 0.36 | 0.09  |
| AY344540 | Alpha-dioxygenase DOX-2      | 0.35 | 0.33  |

**Table S5.** Genes specifically induced or repressed in tomato roots colonized by *G. mosseae* (Gm). Fold change in their expression level compared to non-mycorrhizal plants or upon methyl jasmonate (MeJA) treatment.

| ID       | Annotation                                                                   | Gm    | MeJA   |
|----------|------------------------------------------------------------------------------|-------|--------|
| BG630425 | Proteinase inhibitor I                                                       | 30.86 | 159.77 |
| AJ133600 | Extensin-like protein                                                        | 14.15 | 3.49   |
| BG631444 | Proteinase inhibitor I                                                       | 13.86 | 165.58 |
| BI931127 | Putative miraculin                                                           | 13.09 | 928.35 |
| AF083253 | Multicystatin                                                                | 9.27  | 291.27 |
| BG631366 | Unknown                                                                      | 9.10  | 321.97 |
| BG628187 | Proteinase inhibitor I                                                       | 8.27  | 3.51   |
| BG625870 | Polyphenol oxidase (PPO)                                                     | 6.68  | 20.19  |
| BG628643 | Threonine deaminase                                                          | 6.43  | 111.68 |
| K03291   | Proteinase inhibitor II                                                      | 5.92  | 425.73 |
| BG626001 | Serin protease/subtilisin-like                                               | 5.71  | 30.52  |
| BT013249 | Inducible plastid-lipid associated protein                                   | 4.00  | 170.19 |
| AF242849 | Wound-inducible carboxypeptidase                                             | 3.95  | 9.47   |
| BG629245 | Unknown                                                                      | 3.95  | 0.52   |
| AF146690 | Pto-responsive gene 1 protein                                                | 3.86  | 231.96 |
| X77373   | Glycine rich protein                                                         | 3.42  | 3.94   |
| AJ133601 | Gamma-thionin                                                                | 3.40  | 1.36   |
| BI203812 | Phosphatase (psi14A)                                                         | 3.39  | 41.71  |
| Y10149   | Subtilisin-like protease                                                     | 3.16  | 0.47   |
| CN385118 | Unknown                                                                      | 3.07  | 3.04   |
| BG130169 | Extensin-like                                                                | 2.78  | 9.48   |
| AJ459816 | Phosphatase (psi14B)                                                         | 2.75  | 5.49   |
| AJ459817 | Phosphatase (psi14A)                                                         | 2.57  | 3.11   |
| BI210284 | Unknown                                                                      | 2.55  | 5.94   |
| X71593   | Peroxidase CEVI-1                                                            | 2.53  | 0.75   |
| AJ635324 | Polyphenol oxidase                                                           | 2.44  | 1.47   |
| AW648097 | Unkonwn                                                                      | 2.35  | 7.95   |
| AI773917 | Arogenate dehydrogenase                                                      | 2.33  | 20.60  |
| AW649666 | 1-aminocyclopropane-1-carboxylate oxidase (ACO)                              | 2.32  | 0.72   |
| AY026343 | Non-symbiotic hemoglobin class 1 (Glb1)                                      | 2.27  | 1.10   |
| BG629220 | 1-aminocyclopropane-1-carboxylic acid oxidase (ACO6)                         | 2.20  | 0.43   |
| AW622064 | LOB domain 37 (LBD37)                                                        | 2.15  | 1.74   |
| BG734632 | Unknown                                                                      | 2.13  | 0.63   |
| BF112635 | 1-aminocyclopropane-1-carboxylate oxidase (ACO)                              | 2.09  | 0.60   |
| X94944   | Lipid desaturase-like protein (cevi19)                                       | 2.08  | 0.52   |
| CN384955 | Unknown                                                                      | 2.08  | 2.93   |
| AW649659 | Gibberellic acid-induced gene (gasa4)                                        | 2.07  | 0.08   |
| AI779060 | LOB domain                                                                   | 2.05  | 1.59   |
| BG127217 | Gamma-thionin/defensin                                                       | 2.04  | 1.28   |
| BI206094 | NIP2                                                                         | 2.02  | 1.27   |
| L76632   | Osmotin-like protein                                                         | 1.97  | 1.56   |
| AW625586 | Xyloglucan-specific fungal endoglucanase inhibitor protein precursor (Xegip) | 1.90  | 0.32   |
| BG131634 | Lipase                                                                       | 1.86  | 0.91   |
| CN385868 | Auxin-responsive protein                                                     | 1.85  | 8.45   |
| BG629316 | Unknown                                                                      | 1.84  | 1.54   |
| BE460442 | Phosphopyruvate hydratase                                                    | 1.83  | 0.16   |

|          |                                                             |      |       |
|----------|-------------------------------------------------------------|------|-------|
| BG627786 | Proline rich protein                                        | 1.82 | 0.90  |
| AF022874 | Phosphate transporter 2 (LePT2)                             | 1.78 | 0.07  |
| AY568721 | Wound/stress protein                                        | 1.77 | 0.56  |
| AI782210 | Unknown                                                     | 1.73 | 0.29  |
| BG629955 | Arginine decarboxylase (adc1)                               | 1.73 | 1.96  |
| CN384480 | Peroxidase CEVI-16                                          | 1.71 | 1.25  |
|          |                                                             |      |       |
| BF097029 | Unknown                                                     | 0.60 | 0.37  |
| BI207106 | NADPH:quinone oxidoreductase                                | 0.58 | 4.31  |
| BT013653 | Protein serine/threonine kinase                             | 0.58 | 1.10  |
| AF022020 | IAA9                                                        | 0.58 | 1.26  |
| AW035650 | Serine/threonine phosphatase                                | 0.58 | 1.13  |
| AI895632 | Auxin-inducible SAUR protein                                | 0.57 | 0.67  |
| BT013320 | Nodulin MtN3                                                | 0.57 | 0.72  |
| AI899248 | Transcription factor APETALA 2                              | 0.57 | 0.92  |
| BM535315 | Carboxylesterase                                            | 0.56 | 1.29  |
| CK715114 | UDP-glucosyltransferase                                     | 0.56 | 2.82  |
| BF112381 | Cytochrome c oxidase                                        | 0.55 | 1.86  |
| AF204783 | Unknown                                                     | 0.55 | 1.23  |
| BE460421 | Carboxylesterase                                            | 0.55 | 1.09  |
| AB026983 | Small heat shock protein (leer-sHSP)                        | 0.54 | 1.17  |
| BT014402 | Cohesin                                                     | 0.54 | 1.48  |
| AI772299 | Cytochrome P450 (CYP76C1)                                   | 0.54 | 0.64  |
| AI898501 | DNAJ heat shock protein                                     | 0.54 | 1.83  |
| BM412737 | Protein binding/transcription regulator (BT1)               | 0.52 | 6.52  |
| AF146691 | Eli3 protein                                                | 0.52 | 24.52 |
| BI933005 | Short-chain dehydrogenase/reductase (SDR)                   | 0.52 | 6.02  |
| BT014359 | Purine transmembrane transporter                            | 0.50 | 0.75  |
| BG631327 | Unknown                                                     | 0.50 | 0.34  |
| AY007562 | Glutathione S-transferase                                   | 0.50 | 10.69 |
| AW929113 | Class I small heat shock protein (HSP15.7-CI)               | 0.49 | 1.13  |
| BM410870 | Class I small heat shock protein (HSP26.5-P)                | 0.49 | 0.92  |
| AJ606077 | Spermine synthase (spe4)                                    | 0.49 | 0.48  |
| AI779519 | Unknown                                                     | 0.47 | 0.66  |
| BI210938 | Unknown                                                     | 0.46 | 0.38  |
| BT012739 | ADP-ribose pyrophosphohydrolase                             | 0.46 | 0.66  |
| X92855   | Mannitol dehydrogenase                                      | 0.45 | 3.44  |
| BM410706 | L-ascorbate peroxidase                                      | 0.45 | 1.18  |
| BT013685 | Zinc finger                                                 | 0.44 | 11.81 |
| BG132890 | Dihydroneopterin triphosphate pyrophosphohydrolase (NUDIX1) | 0.44 | 0.83  |
| BM410261 | 3-ketoacyl-CoA synthase 6                                   | 0.42 | 0.74  |
| AI771544 | Homeobox-leucine zipper protein HAT5                        | 0.42 | 0.92  |
| BT014212 | Non-phosphorylating glyceraldehyde dehydrogenase            | 0.38 | 1.09  |
| BT014113 | Phosphosulfolactate synthase-related protein                | 0.36 | 1.17  |
| BM412443 | Calcium-binding EF hand family protein                      | 0.36 | 0.58  |
| BT014414 | Flavonoid glucosyltransferase                               | 0.36 | 20.43 |
| BM535201 | Nodulin ENOD18                                              | 0.35 | 2.49  |
| AI773696 | Lipid transfer protein (LTP2)                               | 0.35 | 0.86  |
| AW648171 | Urease accessory protein G (ureG)                           | 0.35 | 0.88  |
| BG126449 | Calcium:hydrogen antiporter (CAX3)                          | 0.33 | 1.10  |
| BM409988 | Flavonoid glucosyltransferase                               | 0.31 | 1.44  |
| BM536272 | Oxidoreductase 2OG-Fe(II) oxygenase                         | 0.30 | 0.77  |
| AF123256 | Class II small heat shock protein Le-HSP17.6                | 0.30 | 1.13  |



|          |                                              |      |      |
|----------|----------------------------------------------|------|------|
| AW624885 | Unknown                                      | 0.28 | 2.09 |
| AW223624 | UDP-glycosyltransferase                      | 0.28 | 1.55 |
| U72396   | Class II small heat shock protein Le-HSP17.6 | 0.11 | 1.34 |
