# Supplementary figures and images for: Hormonal and transcriptional profiles highlight common and differential host responses to arbuscular mycorrhizal fungi and the regulation of the oxylipin pathway
Source: PubMed Central journal article supplement — J Exp Bot. 2010 Apr 8;61(10):2589–601. doi: 10.1093/jxb/erq089 (PMC2882257; doi:10.1093/jxb/erq089), 2010-04-08

Figure S1

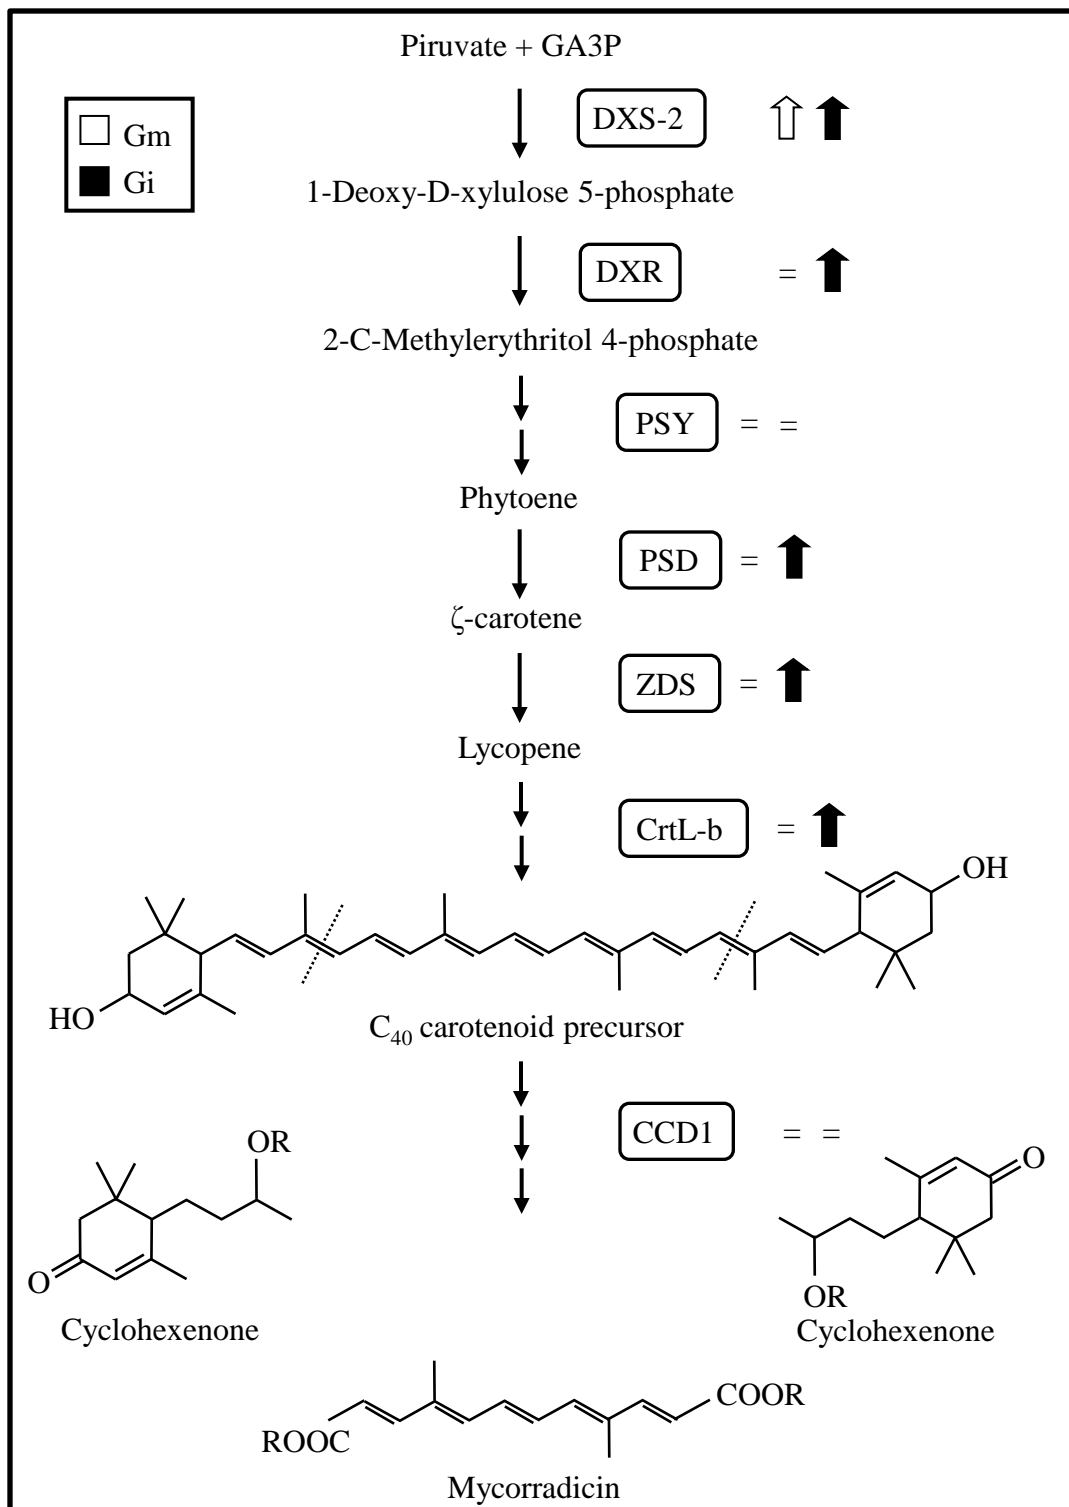

Supplement: erq089_2.pdf [file erq089_2.pdf]
